# Supplementary material
Source: publisher site journal article supplement (https://www.dovepress.com/article/587166)

**Supplementary Tables**

**e-Table 1** Diagnostic criteria of diabetes

| Diagnostic Criteria | Symptoms and Tests |
| --- | --- |
| Have typical diabetes symptoms | Polydipsia, polyuria, polyphagia, unexplained weight loss |
|  | Random blood glucose ≥11.1 mmol/L was noted |
|  | Or with fasting blood glucose ≥7.0 mmol/L |
|  | Or accompanied by oral glucose tolerance test 2h blood glucose ≥11.1 mmol/L |
|  | Or with glycosylated hemoglobin ≥6.5% |
| There were no typical symptoms of diabetes | Recheck to confirm on another day (random blood glucose is not included) |

**e-Table 2** Diagnostic criteria of RVO

| Diagnostic Criteria | Clinical manifestation and examination | |
| --- | --- | --- |
| CRVO | clinical picture | There was a sudden and painless decrease in vision, ranging from no symptoms or only a small amount of black shadow floating in the eyes to a relative afferent pupillary defect in severe cases |
| Accompanied by fundus examination | 1, retinal vein filling, circuity, scattered in the bleeder, shallow linear or flake  2, retinal vein circuity expansion, for the blood sausage samples, the color is dark, a large number of shallow retinal hemorrhage, strong bleeding for flame or flake  3, may be associated with edema |
| With FFA | Retinal vein filling delay, blood capillary dilates, circuity, hemal wall leakage, fluorescence staining |
| BRVO | clinical picture | Sudden onset of different degrees of visual impairment, mild without conscious symptoms or only a small amount of black shadow fluttering in front of the eyes |
| Accompanied by funduscopy | The distribution area of retinal occluded vessels was flamelike hemorrhage, and the occluded vessels were obviously dilated and tortuous than the other branches, and cotton-wool spots were seen |
| Accompanied by FFA | Delayed filling of blocked veins with patchy hypofluorescence. Blood capillary dilate, circuity, the blockage of retinal vein appears vein wall fluorescent dye |

**Abbreviations:** BRVO, branch retinal vein occlusion; CRVO: central retinal vein occlusion; FFA, fundus fluorescein angiography

**e-Table 3** Patients with two treatments

|  | Baseline | 4 weeks | 8 weeks | Every 4 weeks |
| --- | --- | --- | --- | --- |
| Combined group | Anti-VEGF + DEX | Follow-up | Follow-up | PRN |
| Monotherapy group | Anti-VEGF | Anti-VEGF | Anti-VEGF | PRN |

Note: anti-VEGF injection therapy for anti-VEGF drugs, DEX for DEX injection drug treatment, PRN for on-demand anti-VEGF injection or retinal photocoagulation treatment

**e-Table 4** Main equipment for measurements

| Equipment | Equipment manufacturer |
| --- | --- |
| Refractometer NIDEK AR-310A | NIDEK Inc., Japan |
| Non-contact tonometer NIDEK NT - 510 | NIDEK Inc., Japan |
| Fundus camera NIDEK AFC-210 | NIDEK Inc., Japan |
| Fundus fluorescein angiography machine SPECTRALIS HRA | Germany Heidelberg |
| Optical coherence tomography SPECRTALIS OCT | Germany Heidelberg |
| Ultra-wide-field fundus camera Daytona P200T | British OPTOS |
| Multi-wavelength laser photocoagulation instrument MC-500 | NIDEK Inc., Japan |

**e-Table 5** Main medications for treatment

| Drug | Drug manufacturers |
| --- | --- |
| Conbercept | Chengdu KangHong Pharmaceutical Co. LTD |
| Dexamethasone intravitreal implant (OZURDEX) | Allergan Inc |
| Brimonidine Tartrate Eye Drops (ALPHAGAN) | Allergan Ireland |
| Carbetolol Hydrochloride Eye Drops (Carteolol) | Otsuka Pharmaceutical Co., LTD |
| Levofloxacin Eye drops (Levofloxacin) | Yangtze River Pharmaceutical Co. LTD |
| Tobramycin and Dexamethasone Eye Ointment (TobraDex) | Novartis Swiss |
| Proparacaine Hydrochloride Eye Drops (ALCAINE) | Alcon China |

**e-Table 6** The treatment overview during the patient's follow-up period

|  | Monotherapy group  （n=36） | Combined Group  （n=34） | χ2/t | *P* |
| --- | --- | --- | --- | --- |
| Laser photocoagulation （n，%） | 17（47.22） | 15（44.12） | 0.068 | 0.794 |
| Total number of intravitreal injections | 7.50±2.31 | 4.09±1.11 | 7.796 | <0.001 |

**e-Table 7** The BCVA scores in each follow-up point

| Follow-up Visit  (week) | Monotherapy group  （n=36, Letters） | Combined Group  （n=34, Letters） | F | *P* |
| --- | --- | --- | --- | --- |
| 4 | 51.92±18.91 | 55.43±11.01 | 11.983 | 0.001 |
| 8 | 54.14±17.26 | 62.47±12.31 | 22.048 | <0.001 |
| 12 | 59.08±14 | 57.21±11.54 | 0.307 | 0.581 |
| 24 | 55.25±17.77 | 50.67±16.7 | 0.003 | 0.953 |
| 36 | 56.47±15.1 | 56.55±17.31 | 1.315 | 0.256 |
| 48 | 60.25±15.03 | 61.56±14.13 | 1.507 | 0.224 |

Note: Covariates included age, gender, diagnosis, eye, intraocular pressure, baseline BCVA, and past medical history.

**e-Table 8** The BCVA changes in each follow-up point

| Follow-up Visit  (week) | Monotherapy group  （n=36, Letters） | Combined Group  （n=34, Letters） | F | *P* |
| --- | --- | --- | --- | --- |
| 4 | 7.33±12.56 | 17.82±8.70 | 11.008 | 0.002 |
| 8 | 9.54±12.17 | 24.86±12.36 | 25.021 | <0.001 |
| 12 | 14.48±12.86 | 19.60±12.81 | 0.824 | 0.367 |
| 24 | 10.66±15.21 | 13.07±15.58 | 0.001 | 0.973 |
| 36 | 11.87±14.83 | 18.94±16.60 | 1.421 | 0.238 |
| 48 | 15.65±15.63 | 23.95±16.14 | 1.73 | 0.193 |

Note: Covariates included age, gender, diagnosis, eye, intraocular pressure, baseline BCVA, and past medical history.

**e-Table 9** The CMT in each follow-up point

| Follow-up Visit  (week) | Monotherapy group  （n=36, μm） | Combined Group  （n=34, μm） | F | *P* |
| --- | --- | --- | --- | --- |
| 4 | 353.41±136.69 | 358.66±100.05 | 0.016 | 0.9 |
| 8 | 307.91±107.83 | 263.49±63.56 | 5.308 | 0.024 |
| 12 | 273.34±73.17 | 225.62±44.09 | 10.954 | 0.002 |
| 24 | 300.92±119.12 | 382.37±174.72 | 4.701 | 0.034 |
| 36 | 324.67±159.3 | 348.14±138.09 | 0.14 | 0.71 |
| 48 | 250.04±89.25 | 257.73±87.67 | 0.093 | 0.761 |

Note: Covariates included age, gender, diagnosis, eye, intraocular pressure, baseline CMT, and past medical history.

**e-Table 10** The CMT changes in each follow-up point

| Follow-up Visit  (week) | Monotherapy group  （n=36, μm） | Combined Group  （n=34, μm） | F | *P* |
| --- | --- | --- | --- | --- |
| 4 | -202.14±172.17 | -223.14±132.25 | 0.013 | 0.909 |
| 8 | -244.86±183.36 | -318.31±120.76 | 5.333 | 0.024 |
| 12 | -291.38±165.02 | -350.29±136.91 | 6.257 | 0.015 |
| 24 | -254.63±179.59 | -199.43±179.61 | 6.486 | 0.013 |
| 36 | -233.66±177.00 | -233.66±182.21 | 0.3 | 0.586 |
| 48 | -305.51±185.79 | -324.07±157.45 | 0.009 | 0.923 |

Note: Covariates included age, gender, diagnosis, eye, intraocular pressure, baseline CMT, and past medical history.

**e-Table 11** The SFCT in each follow-up point

| Follow-up Visit  (week) | Monotherapy group  （n=36, μm） | Combined Group  （n=34, μm） | F | *P* |
| --- | --- | --- | --- | --- |
| 4 | 212.16±24.33 | 220.18±35.69 | 0.012 | 0.912 |
| 8 | 206.04±28.09 | 196.99±36.03 | 4.87 | 0.031 |
| 12 | 203.31±26.12 | 190.84±49.47 | 4.643 | 0.035 |
| 24 | 204.24±29.98 | 227.46±47.76 | 3.439 | 0.048 |
| 36 | 209.28±32.33 | 220.78±51.42 | 0.135 | 0.715 |
| 48 | 191.96±26.12 | 199.36±45.83 | 0.226 | 0.636 |

Note: Covariates included age, gender, diagnosis, eye, intraocular pressure, baseline SFCT value, and past medical history.

**e-Table 12** The disruption length of ELM in each follow-up point

| Follow-up Visit  (week) | Monotherapy group  （n=36, μm） | Combined Group  （n=34, μm） | F | *P* |
| --- | --- | --- | --- | --- |
| 4 | 226.31±176.43 | 202.93±139.6 | 0.169 | 0.683 |
| 8 | 172.96±166.74 | 141.74±115.64 | 0.55 | 0.461 |
| 12 | 124.83±135.7 | 98.78±105.31 | 0.546 | 0.463 |
| 24 | 159.71±155.52 | 181.08±130.14 | 0.959 | 0.331 |
| 36 | 172.15±176.39 | 167.88±132.14 | 0.002 | 0.968 |
| 48 | 86.11±115.86 | 95.27±95.77 | 0.186 | 0.668 |

Note: Covariates included age, gender, diagnosis, eye, intraocular pressure, baseline ELM disruption length, and past medical history.

**e-Table 13** The disruption length of EZ in each follow-up point

| Follow-up Visit  (week) | Monotherapy group  （n=36, μm） | Combined Group  （n=34, μm） | F | *P* |
| --- | --- | --- | --- | --- |
| 4 | 275.64±199.88 | 267.7±169.18 | 0.001 | 0.972 |
| 8 | 213.37±190.67 | 206.78±133.26 | 0.001 | 0.977 |
| 12 | 153.3±158.41 | 107.52±122.76 | 1.688 | 0.199 |
| 24 | 206.66±184.59 | 218.6±147.52 | 0.307 | 0.581 |
| 36 | 211.44±199.81 | 190.09±137.2 | 0.308 | 0.581 |
| 48 | 102.27±135.69 | 107.38±116.05 | 0.043 | 0.836 |

Note: Covariates included age, gender, diagnosis, eye, intraocular pressure, baseline EZ disruption length, and past medical history.

**e-Table 14** The disruption length of OPL in each follow-up point

| Follow-up Visit  (week) | Monotherapy group  （n=36, μm） | Combined Group  （n=34, μm） | F | *P* |
| --- | --- | --- | --- | --- |
| 4 | 338.33±194.74 | 308.37±105.37 | 0.307 | 0.581 |
| 8 | 280.76±165.01 | 224.23±116.66 | 1.943 | 0.168 |
| 12 | 208.12±151.58 | 170.01±146.54 | 1.125 | 0.293 |
| 24 | 285.79±191.57 | 302.69±190.8 | 0.447 | 0.506 |
| 36 | 273.22±178.73 | 246.63±144.59 | 0.634 | 0.429 |
| 48 | 152.02±156.08 | 137.5±114.48 | 0.233 | 0.631 |

Note: Covariates included age, gender, diagnosis, eye, intraocular pressure, baseline OPL disruption length, and past medical history.

**e-Table 15** The NSD in each follow-up point

| Follow-up Visit  (week) | Monotherapy group  （n=36, μm） | Combined Group  （n=34, μm） | F | *P* |
| --- | --- | --- | --- | --- |
| 4 | 125.76±126.48 | 130.16±91.24 | 0.016 | 0.898 |
| 8 | 91.91±94.5 | 59.61±72.61 | 3.305 | 0.074 |
| 12 | 56.01±73.28 | 35.62±65.7 | 2.085 | 0.154 |
| 24 | 77.8±87.32 | 113.55±93.97 | 1.236 | 0.270 |
| 36 | 99.78±126.76 | 102.39±89.5 | 0.141 | 0.709 |
| 48 | 36.22±90.13 | 25.09±36.91 | 0.467 | 0.497 |

Note: Covariates included age, gender, diagnosis, eye, intraocular pressure, baseline NSD, and past medical history.

**e-Table 16** The number of HRFs in each follow-up point

| Follow-up Visit  (week) | Monotherapy group  （n=36） | Combined Group  （n=34） | F | *P* |
| --- | --- | --- | --- | --- |
| 4 | 11.47±5.36 | 11±4.97 | 0.338 | 0.563 |
| 8 | 9.33±5.43 | 7.71±3.5 | 3.236 | 0.077 |
| 12 | 7.64±3.72 | 5.71±2.98 | 7.6 | 0.008 |
| 24 | 7.42±3.83 | 8.44±3.4 | 1.701 | 0.197 |
| 36 | 7.94±4.86 | 8.32±4.47 | 0.069 | 0.794 |
| 48 | 5.56±3.29 | 5.12±3.06 | 0.354 | 0.554 |

Note: Covariates included age, gender, diagnosis, eye, intraocular pressure, baseline HRFs, and past medical history.

**e-Table 17** The number of HE in each follow-up point

| Follow-up Visit  (week) | Monotherapy group  （n=36） | Combined Group  （n=34） | F | *P* |
| --- | --- | --- | --- | --- |
| 4 | 2.69±2.21 | 1.59±1.28 | 10.562 | 0.002 |
| 8 | 2.78±2.58 | 1.26±0.75 | 14.401 | < 0.0001 |
| 12 | 1.89±2.08 | 1.15±0.7 | 4.466 | 0.038 |
| 24 | 2.19±2.46 | 1.62±1.07 | 1.583 | 0.213 |
| 36 | 1.92±1.93 | 1.41±1.05 | 1.654 | 0.203 |
| 48 | 1.36±1.5 | 1.18±0.83 | 0.225 | 0.637 |

Note: Covariates included age, gender, diagnosis, eye, intraocular pressure, baseline HE, and past medical history.

**e-Table 18** The number of eyes with DRIL in each follow-up point

| Follow-up Visit  (week) | Monotherapy group  （n=36） | Combined Group  （n=34） | F | *P* |
| --- | --- | --- | --- | --- |
| Baseline | 34（94.4%） | 33（97.1%） | 0.291 | 0.589 |
| 4 | 24（66.7%） | 14（41.2%） | 4.578 | 0.032 |
| 8 | 22（61.1%） | 12（35.3%） | 4.666 | 0.031 |
| 12 | 21（58.3%） | 17（50%） | 0.489 | 0.484 |
| 24 | 24（66.7%） | 21（61.8%） | 0.183 | 0.669 |
| 36 | 24（66.7%） | 22（64.7%） | 0.03 | 0.863 |
| 48 | 18（50%） | 16（47.1%） | 0.061 | 0.806 |

Note: Covariates included age, gender, diagnosis, eye, intraocular pressure, baseline DRIL number, and past medical history.

**e-Table 19** The correlation between baseline OCT biomarkers and BCVA

| Baseline OCT Biomarkers | Baseline BCVA | | Final BCVA | |
| --- | --- | --- | --- | --- |
| R* | P | R* | P |
| CMT | -0.179 | 0.139 | -0.082 | 0.502 |
| SFCT | -0.199 | 0.098 | -0.044 | 0.715 |
| EZ | -0.235 | 0.051 | 0.027 | 0.827 |
| ELM | -0.256 | 0.033 | -0.05 | 0.679 |
| NSD | -0.239 | 0.046 | -0.134 | 0.269 |
| OPL | -0.092 | 0.449 | -0.004 | 0.971 |
| HRFs | -0.222 | 0.061 | -0.055 | 0.651 |
| HE | 0.012 | 0.921 | -0.26 | 0.03 |
| DRIL | 0.122 | 0.313 | 0.133 | 0.272 |

Note: *Pearson correlation coefficient or Spearman rank correlation coefficient.

**e-Table 20** The correlation between baseline OCT biomarkers and BCVA

| Baseline OCT Biomarkers | Baseline BCVA | | Final BCVA | |
| --- | --- | --- | --- | --- |
| R* | P | R* | P |
| SFCT | 0.534 | <0.001 | -0.12 | 0.322 |
| EZ | 0.406 | <0.001 | -0.234 | 0.051 |
| ELM | 0.396 | 0.001 | -0.228 | 0.058 |
| NSD | 0.746 | <0.001 | 0.02 | 0.867 |
| OPL | 0.512 | <0.001 | -0.152 | 0.208 |
| HRFs | 0.171 | 0.157 | -0.057 | 0.642 |
| HE | 0.191 | 0.114 | 0.249 | 0.038 |
| DRIL | 0.012 | 0.92 | -0.01 | 0.931 |

Note: *Pearson correlation coefficient or Spearman rank correlation coefficient.

**Supplementary Tables**

**Figure legend**

**e-Figure 1** Retinal structural features


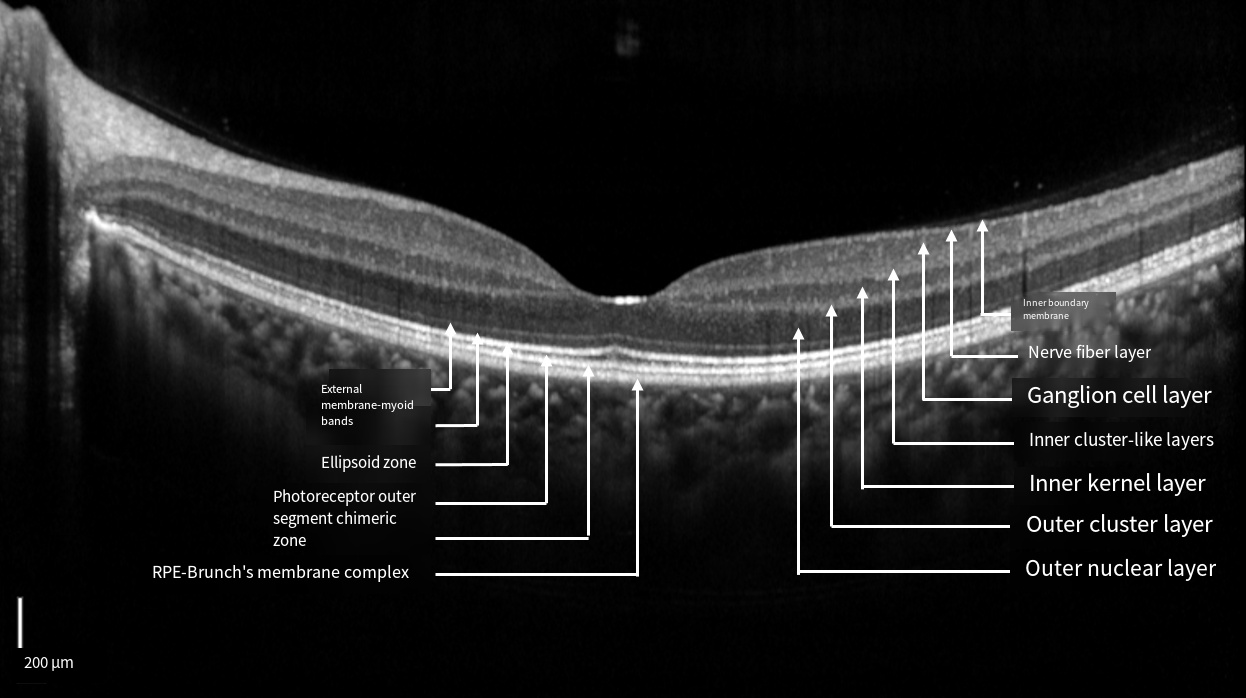


**e-Figure 2** Abnormal retinal structural features. (A-C) shows horizontal foveal OCT scan and local magnification images of 3 ME patients; (Ai-Aii) Patient 1 had NSD, HRFs, and OPL destruction; (Bi-Bii) patient 2 had thickening of HE and SFCT; (Ci-Cii) patient 3 had DRIL

**Abbreviations:** CMT, central macular thickness; DRIL, disorganization of retinal inner layers; ELM, external limiting membrane; EZ, ellipsoid zone; HE, hard exudate; HRFs, hyperreflective retinal foci; ME, macular edema; NSD, neurosensory detachment; OPL, outer plexiform layer; SFCT, subfoveal choroidal thickness

**e-Figure 3** The OCT biomarkers in each follow-up point. Error bars indicate 95% CIs. ns*P*>0.05, **P*<0.05, ***P*<0.01, ****P*<0.001. (A) Mean SFCT in 48 weeks; (B) Mean disruption length of EZ in 48 weeks; (C) Mean disruption length of ELM in 48 weeks; (D) Mean disruption length of OPL in 48 weeks; (E) Mean DRIL in 48 weeks; (F) Mean HRFs in 48 weeks; (G) Mean HE in 48 weeks; (H) Mean NSD in 48 weeks

**Abbreviations:** DRIL, disorganization of retinal inner layers; ELM, external limiting membrane; EZ, ellipsoid zone; HE, hard exudate; HRFs, hyperreflective retinal foci; NSD, neurosensory detachment; OCT, optical coherence tomography; OPL, outer plexiform layer; SFCT, subfoveal choroidal thickness


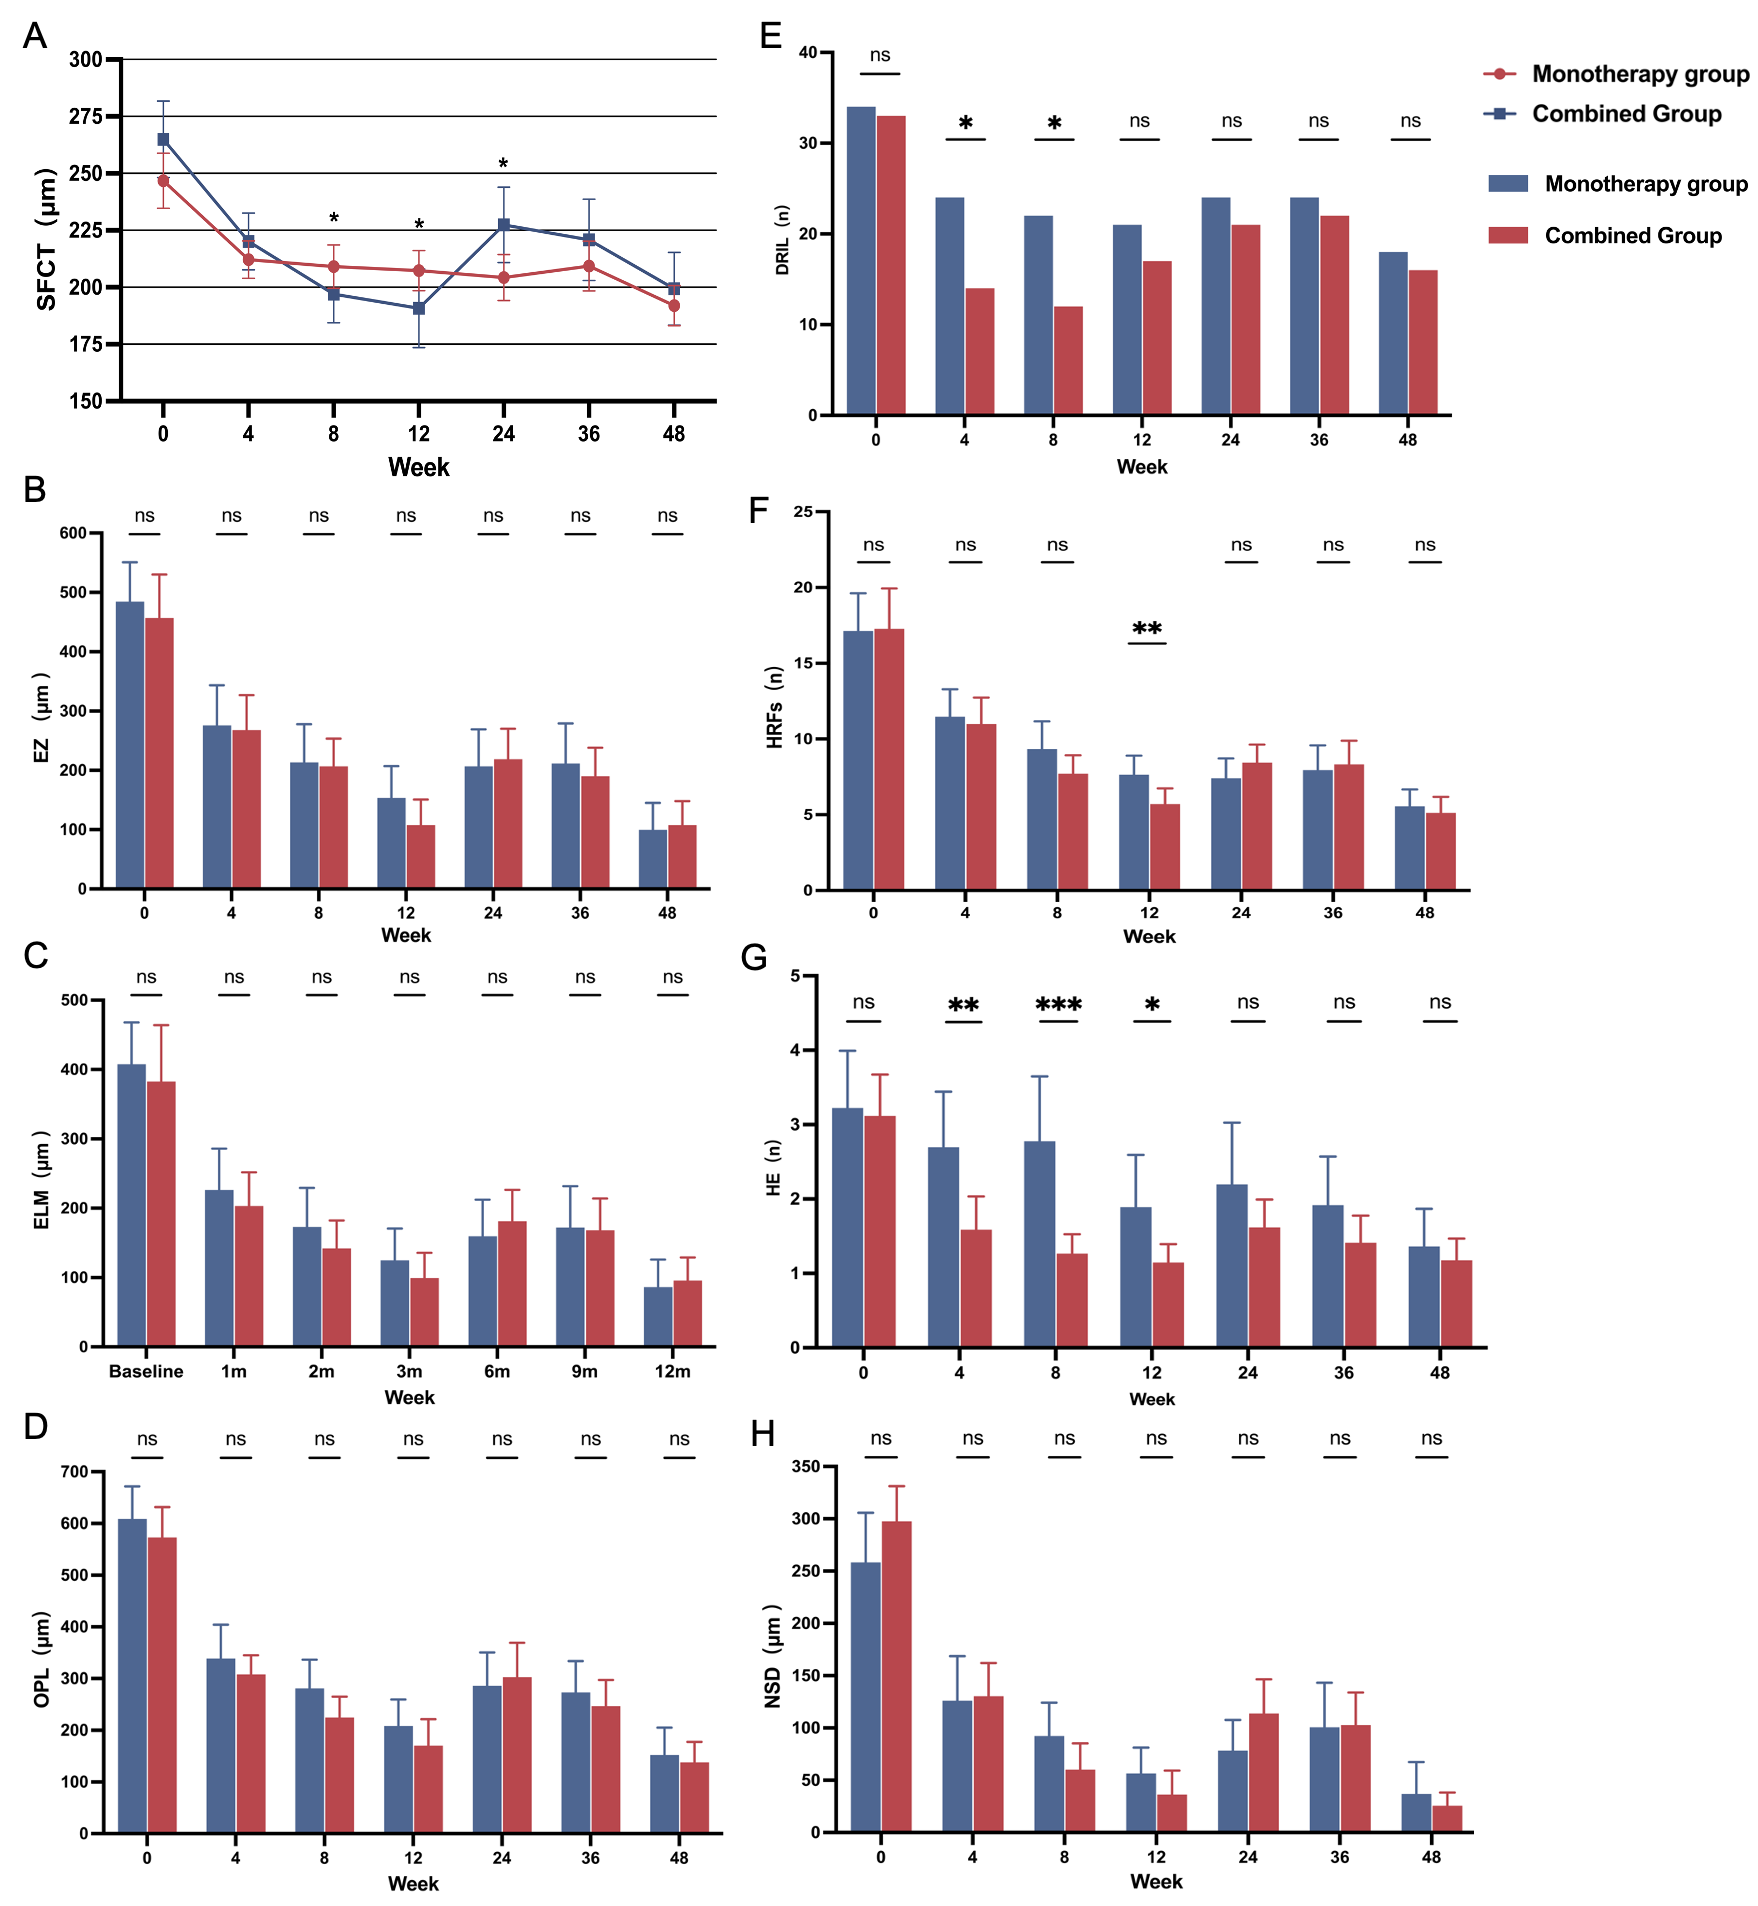

Supplement: Supplementary file 1 [file 587166%20Revised%20%2509Supplement.docx]
